# Supplementary material
Source: MDPI journal article supplement (https://www.mdpi.com/2304-6740/11/2/78)
Supplement: s1 [file s1]

## Supplementary Information (SI)

### Effect of the solvent on the crystallographic and magnetic properties of rhenium(IV) complexes based on 2,2'-bipyrimidine ligand

Adrián Sanchis-Perucho<sup>1</sup>, Marta Orts-Arroyo<sup>1</sup>, Nicolas Moliner<sup>1</sup> and José martinez-Lillo<sup>1,\*</sup>

<sup>1</sup>Departament de Química Inorgànica / Instituto de Ciencia Molecular (ICMol), Universitat de València, c/ Catedrático José Beltran 2, Paterna, 46980 València, Spain; adrian.sanchis@uv.es (A. S.-P.); marta.orts-arroyo@uv.es (M.O.-A.); fernando.moliner@uv.es (N.M.)

\*Corresponding author: f.jose.martinez@uv.es; Tel.: +34-9635-44460

| Table of contents | page |
|-------------------|------|
| Figure S1 .....   | 2    |
| Figure S2 .....   | 2    |
| Figure S3 .....   | 3    |
| Figure S4 .....   | 3    |
| Figure S5 .....   | 4    |
| Figure S6 .....   | 4    |
| Figure S7 .....   | 5    |

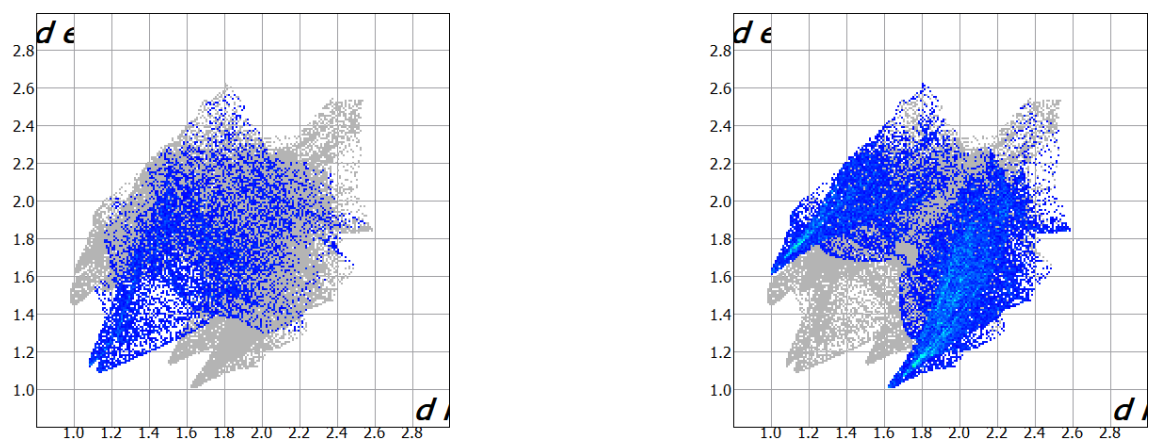

**Figure S1.** Fingerprint plots for the  $[\text{ReCl}_4(\text{bpym})]$  complex in **1** highlighting the region assigned to the  $\text{N}\cdots\text{H}$  interactions (left) and to the  $\text{Cl}\cdots\text{H}$  interactions (right).

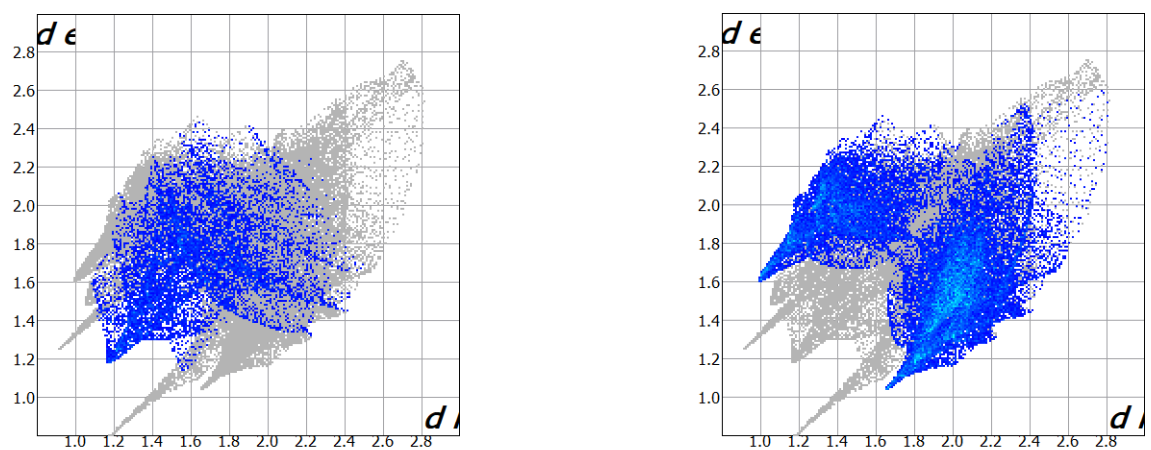

**Figure S2.** Fingerprint plots for the  $[\text{ReCl}_4(\text{bpym})]$  complex in **2** highlighting the region assigned to the  $\text{O}\cdots\text{H}$  interactions (left) and to the  $\text{Cl}\cdots\text{H}$  interactions (right).

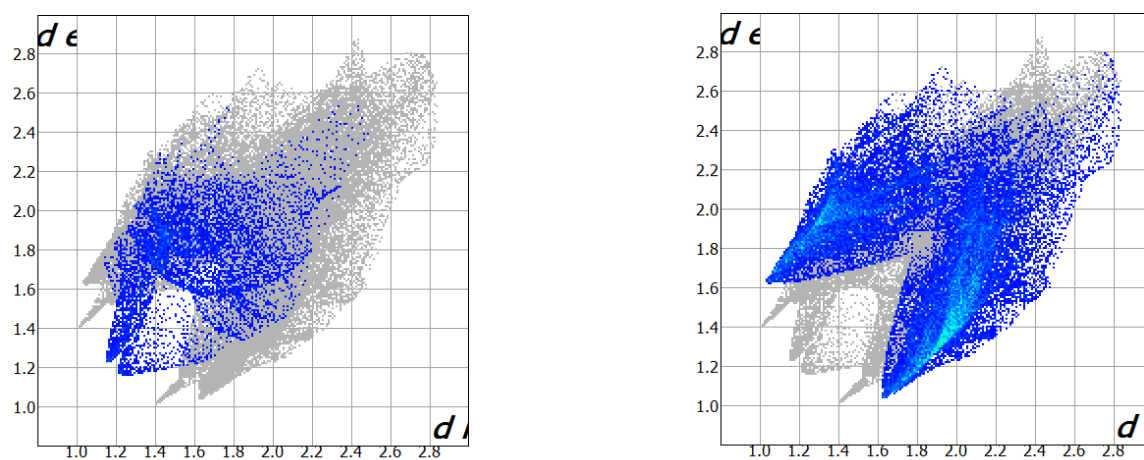

**Figure S3.** Fingerprint plots for the non-solvated  $[\text{ReCl}_4(\text{bpym})]$  complex highlighting the region assigned to the  $\text{N}\cdots\text{H}$  interactions (left) and to the  $\text{Cl}\cdots\text{H}$  interactions (right).

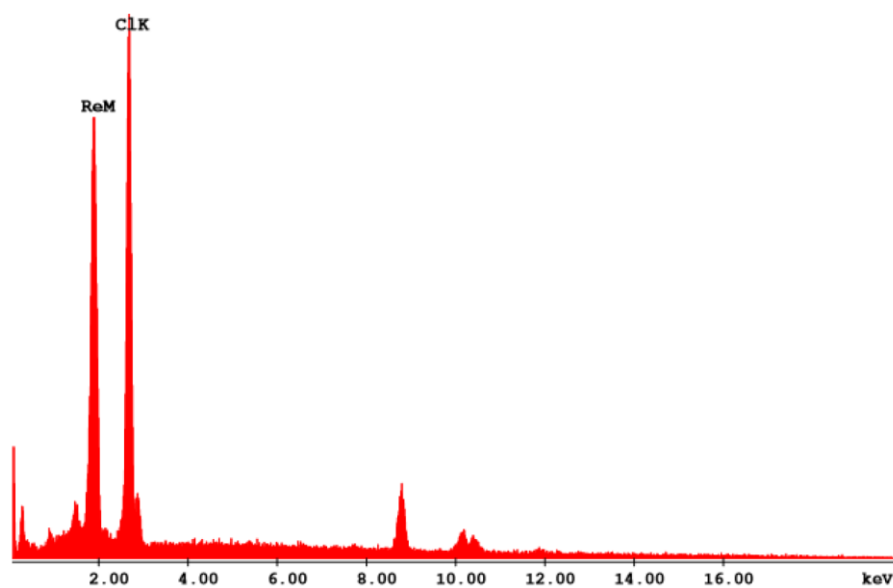

**Figure S4.** SEM-EDX spectrum for compound **1**.

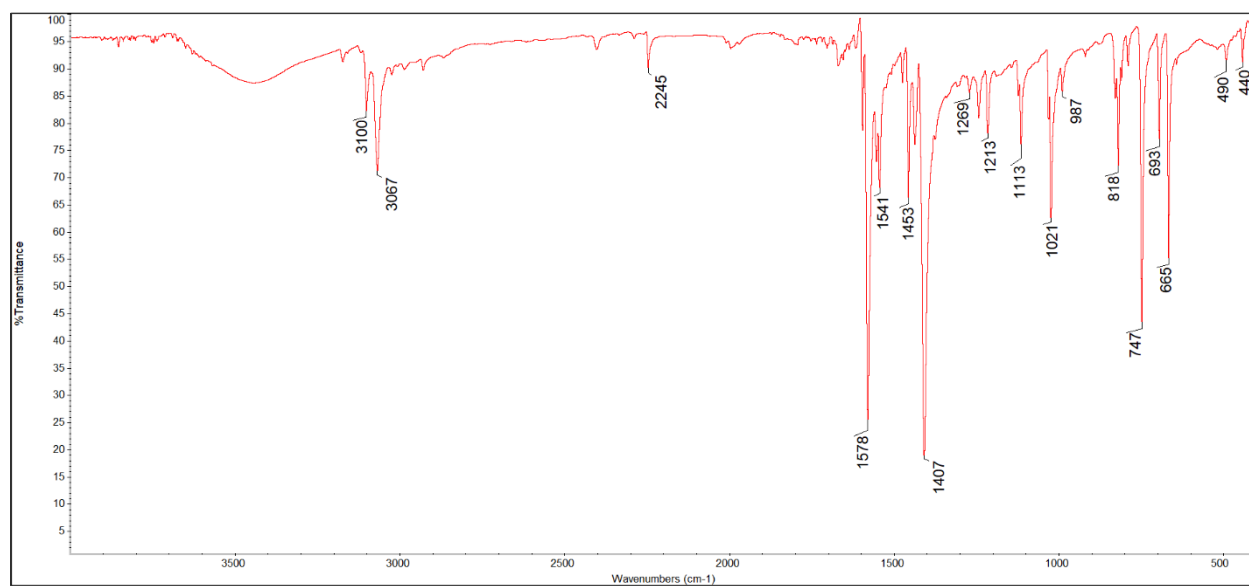

**Figure S5.** Infrared spectrum (FT-IR) for compound **1**.

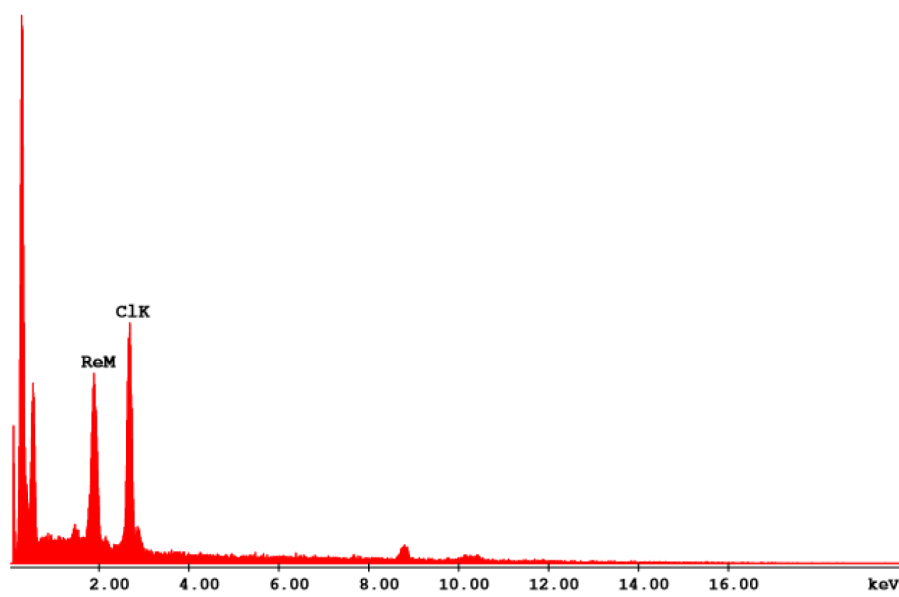

**Figure S6.** SEM-EDX spectrum for compound **2**.

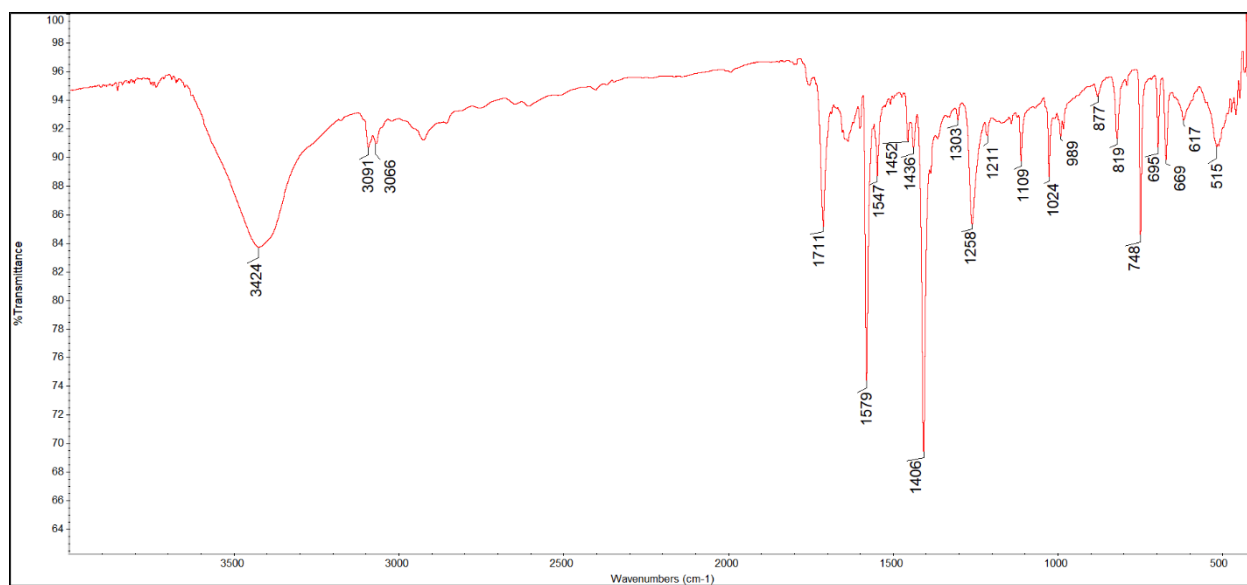

**Figure S7.** Infrared spectrum (FT-IR) for compound **2**.
